# Supplementary material for: Characterization of a set of novel meiotically-active promoters in Arabidopsis
Source: PubMed Central journal article supplement (PMC3462685; doi:10.1186/1471-2229-12-104), 2012-07-09
Supplement: 1471-2229-12-104-S1.pdf [file 1471-2229-12-104-S1.pdf]

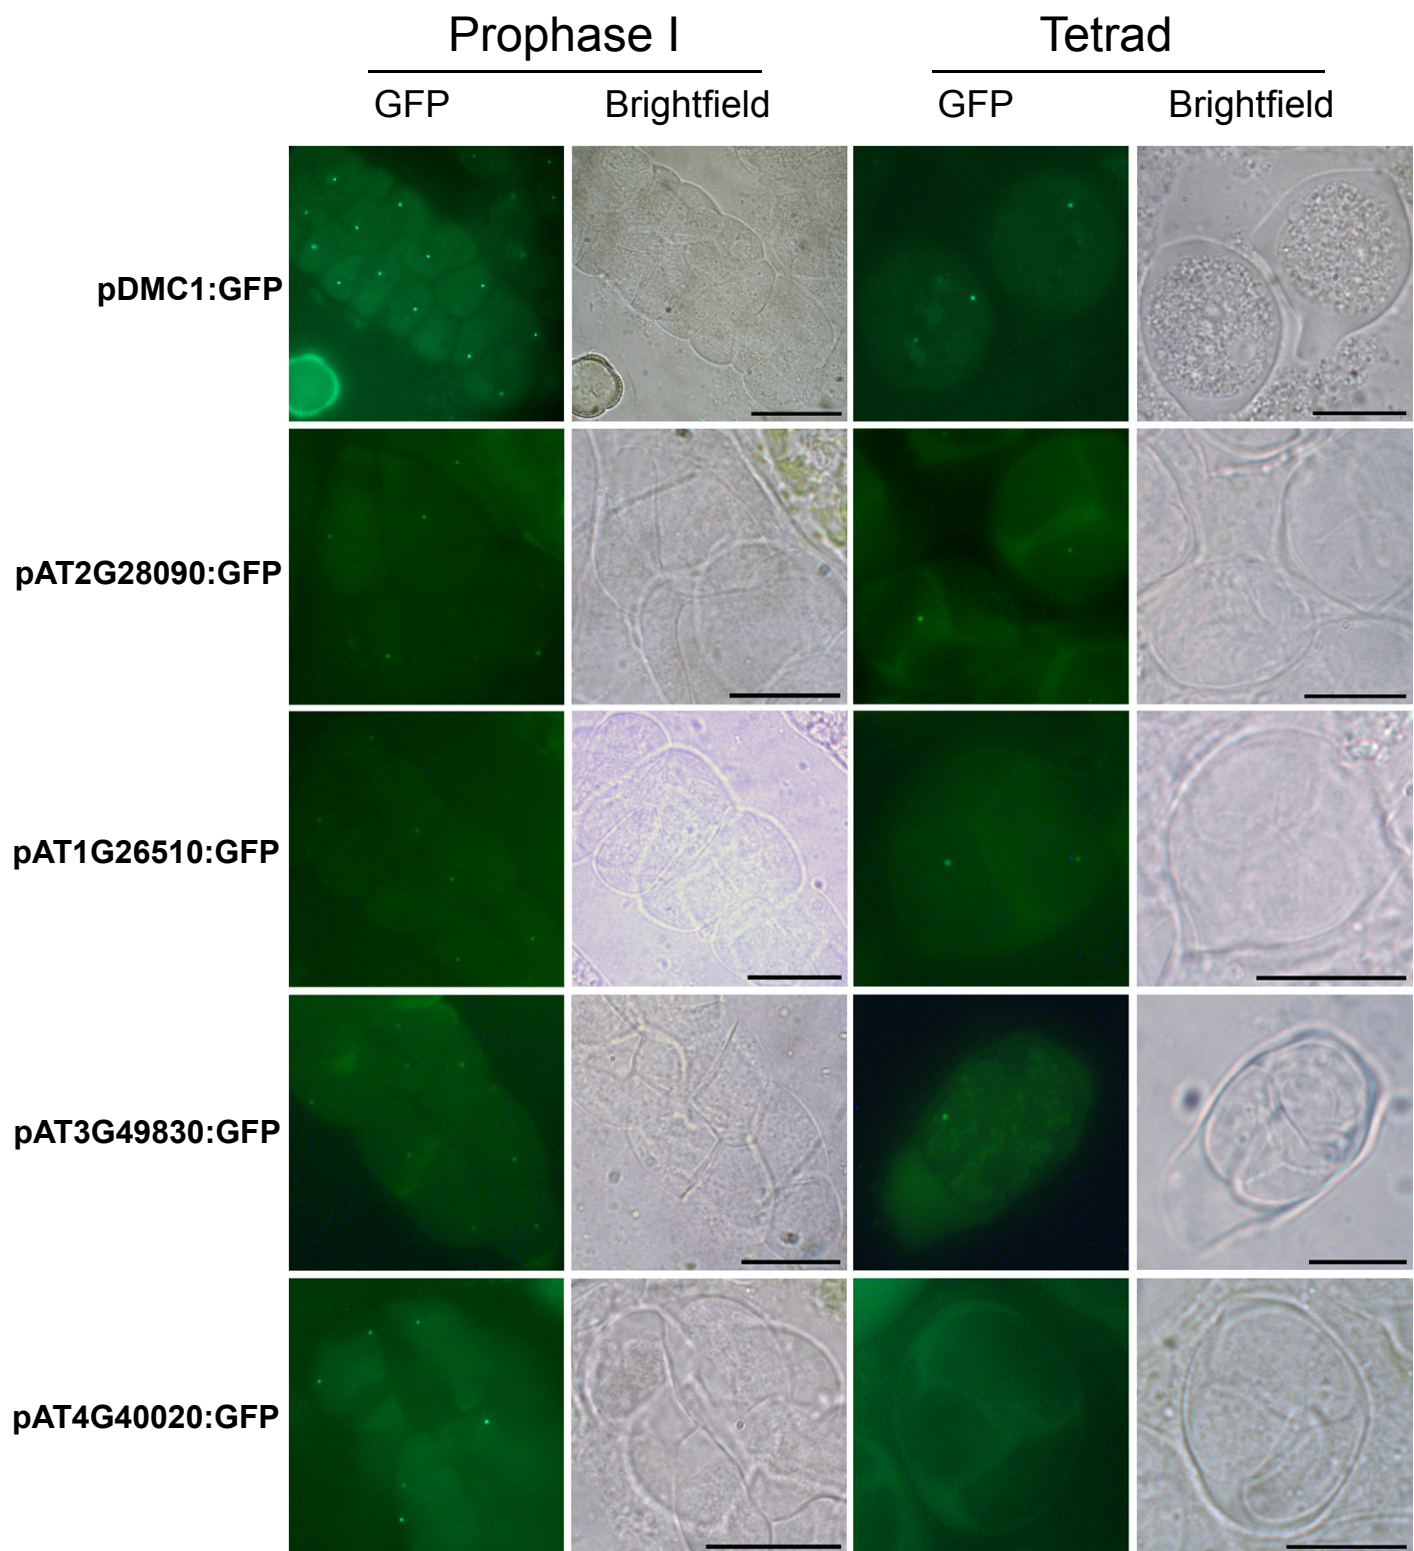

**Figure S1** GFP signals in meiocytes driven by meiotic active promoters. The name of the respective construct is on the left. Each GFP image has a corresponding bright-field image on the right. Scale bars, 10  $\mu$ m.

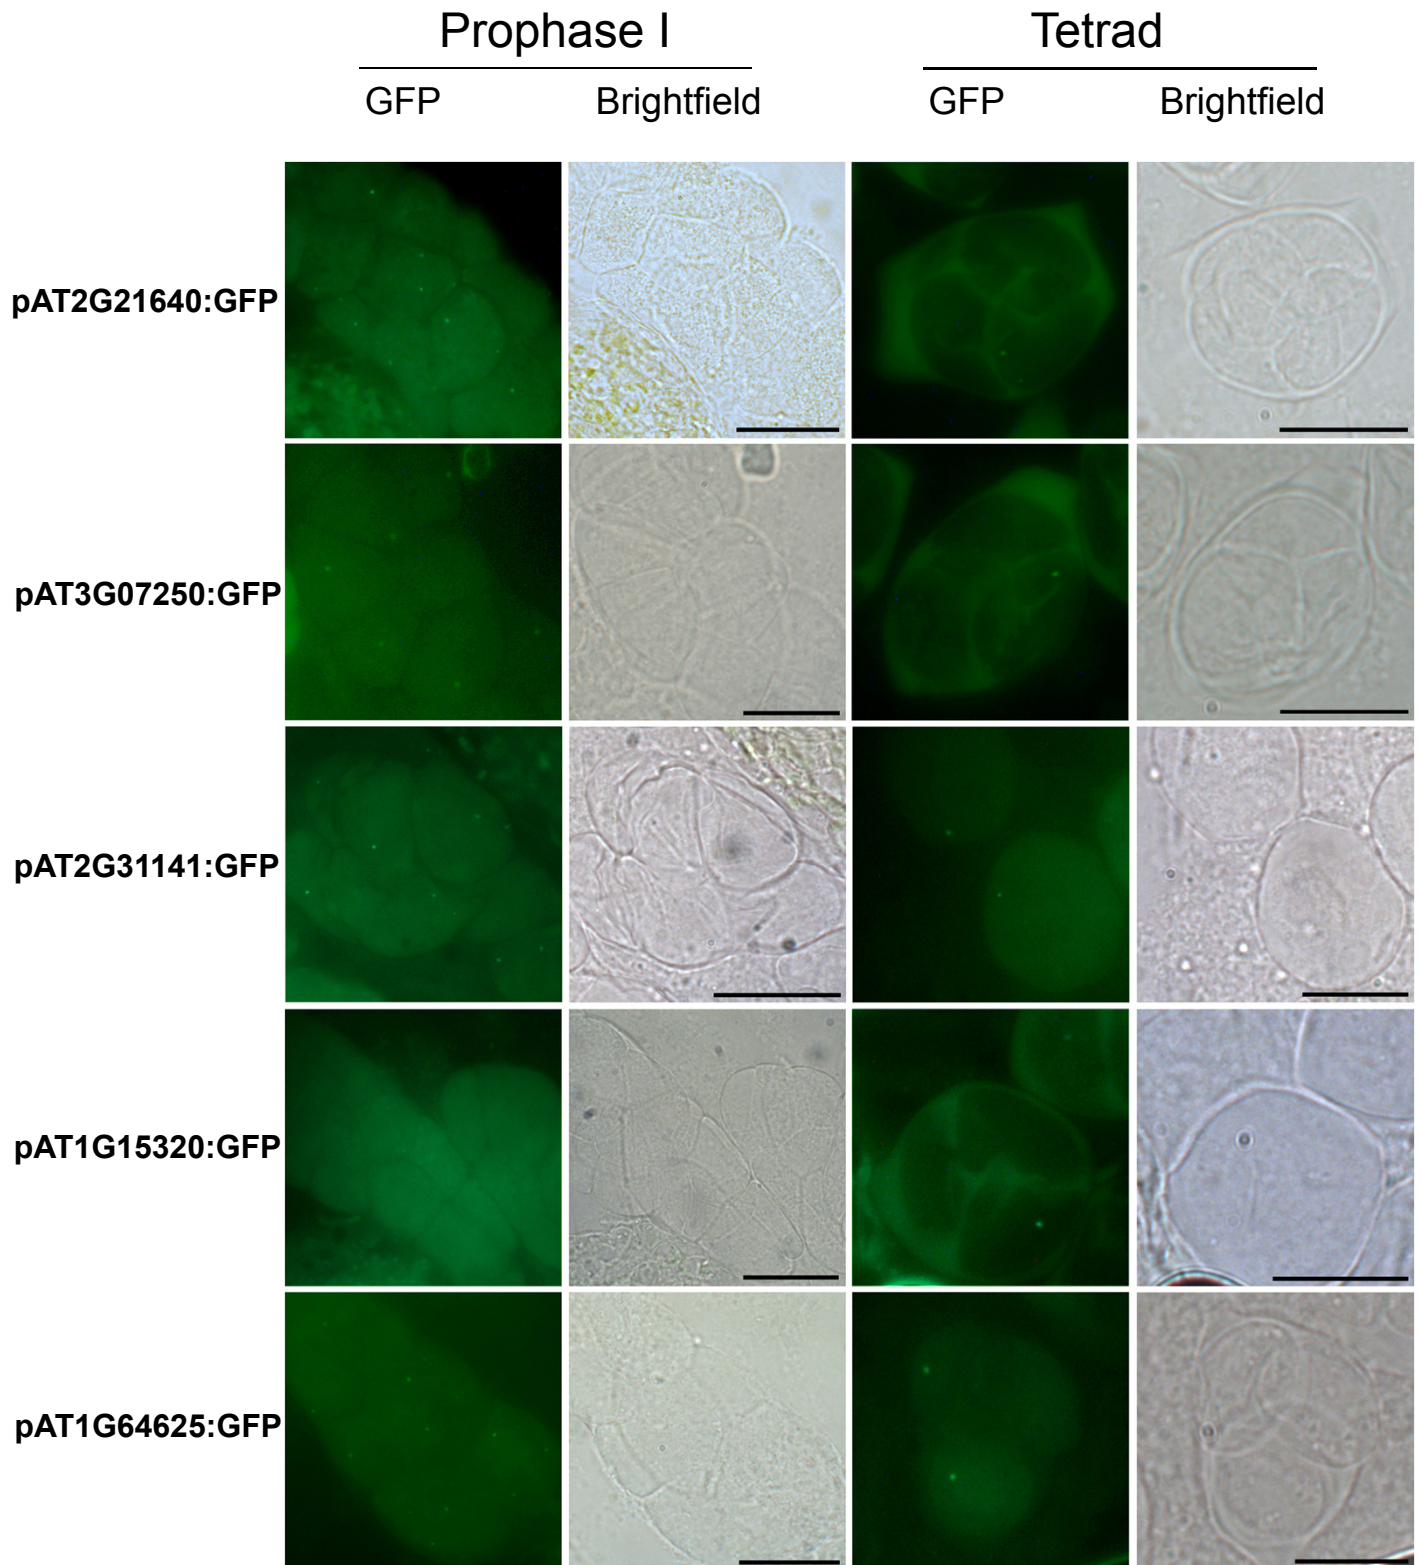

Figure S1 (continued)
