# Supplementary material for: Characterization of a set of novel meiotically-active promoters in Arabidopsis
Source: PubMed Central journal article supplement (PMC3462685; doi:10.1186/1471-2229-12-104), 2012-07-09
Supplement: 1471-2229-12-104-S3.pdf [file 1471-2229-12-104-S3.pdf]

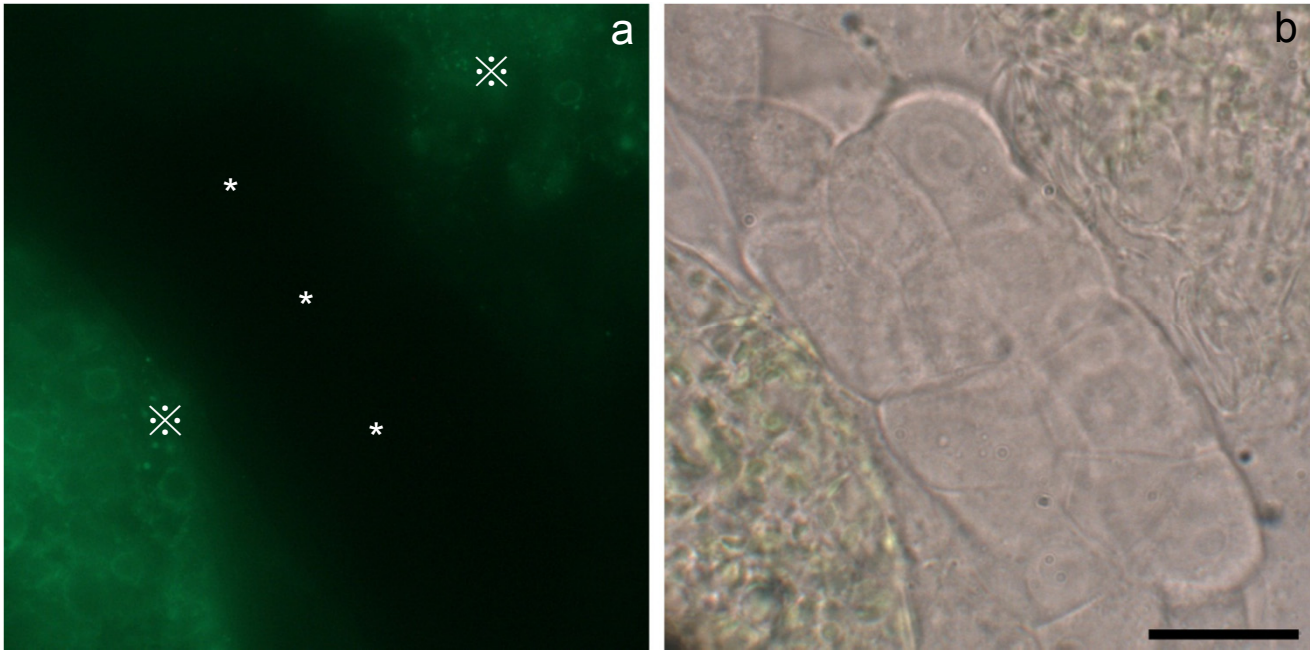

**Figure S3** GFP signals in both somatic and meiotic cells driven by a constitutive promoter. The GFP signals from an endoplasmic reticulum marker are driven by a CaMV 35S promoter with dual enhancer elements (d35S). (a) shows GFP signals only in somatic cells (✖), not in the meiosis I cluster (\*); (b) is the corresponding bright-field image. Scale bars, 10  $\mu\text{m}$
