# Supplementary material for: Characterization of a set of novel meiotically-active promoters in Arabidopsis
Source: PubMed Central journal article supplement (PMC3462685; doi:10.1186/1471-2229-12-104), 2012-07-09
Supplement: 1471-2229-12-104-S4.pdf [file 1471-2229-12-104-S4.pdf]

**Table S1** PLACE motifs enriched in promoters of meiotically-active genes.

| PLACE motif      | Motif pattern | Brief description                                                                                                                                                                                                      |
|------------------|---------------|------------------------------------------------------------------------------------------------------------------------------------------------------------------------------------------------------------------------|
| DOFCOREZM *      | AAAG          | Core site for binding of Dof proteins.                                                                                                                                                                                 |
| ARR1AT*          | NGATT         | Binding element of a response regulator ARR1.                                                                                                                                                                          |
| CACTFTPPCA1*     | YACT          | A key component of Mem1 that determines the mesophyll-specific expression of <i>ppcA1</i> .                                                                                                                            |
| CAATBOX1*        | CAAT          | A motif associated with a seed storage protein gene.                                                                                                                                                                   |
| GT1CONSENSUS*    | GRWAAW        | A consensus binding site in many light-regulated genes.                                                                                                                                                                |
| POLLENILELAT52 * | AGAAA         | One of two co-dependent regulatory elements responsible for the pollen specific activation of tomato <i>LAT52</i> .                                                                                                    |
| GATABOX *        | GATA          | Required for high level, light regulated and tissue specific control of transcription.                                                                                                                                 |
| EBOXBNNAPA       | CANNTG        | E-box of <i>napA</i> storage-protein gene.                                                                                                                                                                             |
| MYCCONSENSUSAT   | CANNTG        | MYC recognition site found in the promoters of the dehydration-responsive gene <i>rd22</i> and many other genes in <i>Arabidopsis</i> ; binding site of ICE1; also known as RRE (R response element).                  |
| GTGANTG10*       | GTGA          | Plays an important role in modulating the expression of tobacco late pollen gene <i>g10</i> and tomato gene <i>lat56</i> .                                                                                             |
| WRKY71OS*        | TGAC          | A core of TGAC-containing W-box, the W-box elements within <i>PR-10</i> genes are binding site of parsley WRKY protein; binding site of rice WRKY71, a transcriptional repressor of the gibberellin signaling pathway. |
| ACGTATERD1       | ACGT          | Required for etiolation-induced expression of <i>erd1</i> in <i>Arabidopsis</i> .                                                                                                                                      |
| ROOTMOTIFTAPOX1  | ATATT         | Motif found both in promoters of <i>rolD</i> .                                                                                                                                                                         |
| NODCON2GM *      | CTCTT         | A putative nodulin consensus sequence.                                                                                                                                                                                 |
| OSE2ROOTNODULE*  | CTCTT         | One of the consensus sequence motifs of organ-specific elements (OSE), characteristic of the promoters activated in infected cells of root nodules.                                                                    |
| RAV1AAT*         | CAACA         | Binding consensus sequence of <i>Arabidopsis</i> transcription factor RAV1; expression levels of <i>RAV1</i> are relatively high in rosette                                                                            |

|                    |         |                                                                                                                                                                  |
|--------------------|---------|------------------------------------------------------------------------------------------------------------------------------------------------------------------|
|                    |         | leaves and roots.                                                                                                                                                |
| TAAAGSTKST1        | TAAAG   | Found in promoter of <i>Solanum tuberosum KST1</i> gene; target site for trans-acting StDof1 protein controlling guard cell-specific gene expression.            |
| SEF4MOTIFGM7S*     | RTTTTTR | Consensus sequence found in 5' upstream region of beta-conglycinin (7S globulin) gene; binding site for SEF4.                                                    |
| WBOXNTERF3         | TGACY   | May be involved in activation of <i>ERF3</i> gene by wounding.                                                                                                   |
| IBOXCORE           | GATAA   | Conserved sequence upstream of light-regulated genes.                                                                                                            |
| MYBCORE            | CNGTTR  | Binding site for all animal MYB and two <i>Arabidopsis</i> MYB proteins (ATMYB1 and ATMYB2).                                                                     |
| TATABOX5*          | TTATTT  | A functional TATA element.                                                                                                                                       |
| WBOXATNPR1*        | TTGAC   | Found in promoter of <i>Arabidopsis NPR1</i> gene; a cluster of WRKY binding sites act as negative regulatory elements for the inducible expression of AtWRKY18. |
| GTIGMSCAM4         | GAAAAA  | Plays a role in pathogen- and salt-induced <i>SCaM-4</i> gene expression.                                                                                        |
| SURECOREATSULTR11* | GAGAC   | Core of sulfur-responsive element found in the promoter of <i>SULTR1</i> .                                                                                       |
| CURECORECR         | GTAC    | The core of a copper-response element, involved in oxygen-response of these genes.                                                                               |
| EECCRAH1*          | GANTTNC | Consensus motif of the two enhancer elements, EE-1 and EE-2; binding site of Myb transcription factor LCR1.                                                      |
| POLASIG1           | AATAAA  | Near upstream elements (NUE) in <i>Arabidopsis</i> .                                                                                                             |
| POLASIG3           | AATAAT  | Consensus sequence for plant polyadenylation signal.                                                                                                             |
| ABRELATERD1        | ACGTG   | ABRE-like sequence required for etiolation-induced expression of <i>erd1</i> in <i>Arabidopsis</i> .                                                             |

---

N=G/A/C/T, Y=T/C, R=A/G, W=A/T ; \* refers to motifs found in all meiotically-active promoters.
