# Supplementary material for: Characterization of a set of novel meiotically-active promoters in Arabidopsis
Source: PubMed Central journal article supplement (PMC3462685; doi:10.1186/1471-2229-12-104), 2012-07-09
Supplement: 1471-2229-12-104-S5.pdf [file 1471-2229-12-104-S5.pdf]

**Table S2** Statistically overrepresented motifs in the promoters of meiotically-active genes.

| <b>MATRIX_ID</b> | <b><i>p</i>-value</b> | <b>Name/Class/Family of the TF</b>                 | <b>Description of the CRE</b>                                                                                                |
|------------------|-----------------------|----------------------------------------------------|------------------------------------------------------------------------------------------------------------------------------|
| MA0128.1         | 9.03657e-03           | EMBP-1; Zipper-type;<br>Leucine zipper             | Involved in ABA-mediated stress-signaling pathway [52].                                                                      |
| MA0044.1         | 1.52751e-02           | HMG-1; Other alpha-helix;<br>High mobility group   | Binding site of the chromatin-associated protein HMG-1 [3, 48].                                                              |
| MA0045.1         | 4.32294e-02           | HMG-I/Y; Other alpha-helix;<br>High mobility group | Binding site of the chromatin-associated protein HMG-I/Y [48].                                                               |
| MA0129.1         | 4.67192e-02           | TGA1A; Zipper-type;<br>Leucine zipper              | A positive light regulatory element [52].                                                                                    |
| MA0121.1         | 9.30809e-02           | ARR10; Helix-turn-helix;<br>Myb                    | Core binding site of motif B in ARR10 [50].                                                                                  |
| MA0096.1         | 9.96644e-02           | bZIP910; Zipper-type;<br>Leucine zipper            | Binding site of two bZIP proteins that are expressed predominantly in vascular tissues, carpels and anthers in flowers [51]. |

TF = transcription factor.
