# Supplementary material for: Characterization of a set of novel meiotically-active promoters in Arabidopsis
Source: PubMed Central journal article supplement (PMC3462685; doi:10.1186/1471-2229-12-104), 2012-07-09
Supplement: 1471-2229-12-104-S6.pdf [file 1471-2229-12-104-S6.pdf]

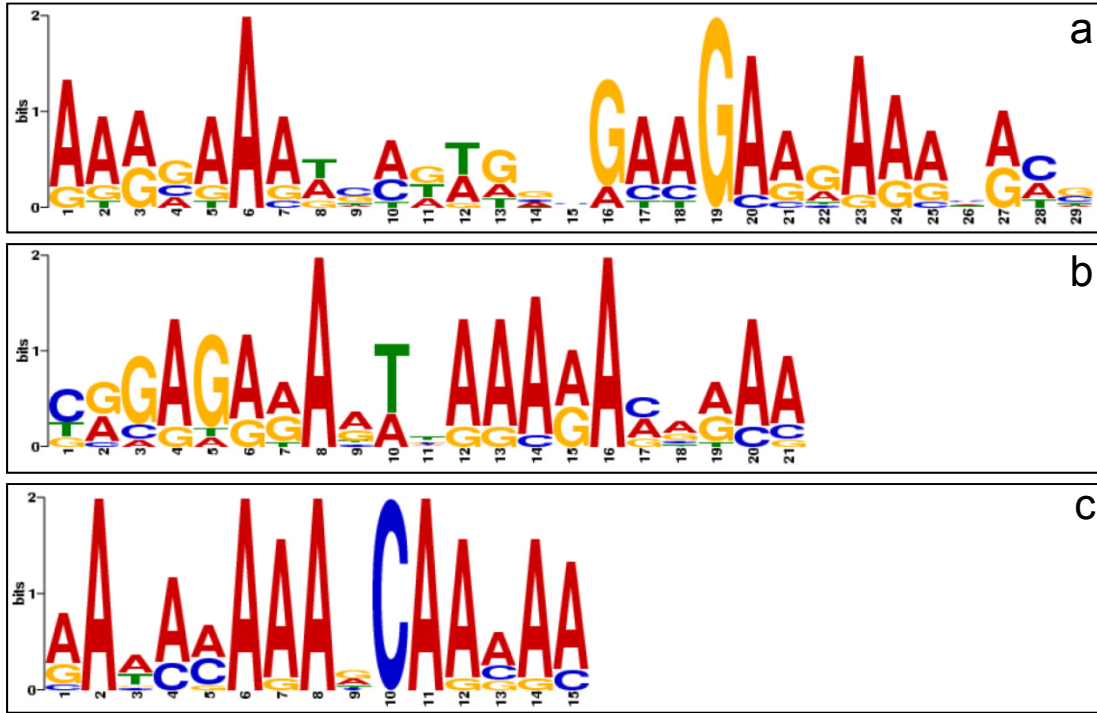

**Figure S4** Sequence logos of novel motifs in meiotically-active promoters found by MEME. (a), E-value: 2.8e-001; found within 12 promoters. (b), E-value: 2.2e+002; found within 12 promoters. (c), E-value: 8.7e+001; found within 12 promoters.
