# Supplementary material for: Characterization of a set of novel meiotically-active promoters in Arabidopsis
Source: PubMed Central journal article supplement (PMC3462685; doi:10.1186/1471-2229-12-104), 2012-07-09
Supplement: 1471-2229-12-104-S7.pdf [file 1471-2229-12-104-S7.pdf]

**Table S3** A list of homologous recombination-related genes for comparative promoter analysis.

| <b>Name</b>         | <b>AGI Identifier</b> |
|---------------------|-----------------------|
| <i>AtSPO11-1</i>    | AT3G13170             |
| <i>AtSPO11-2</i>    | AT1G63990             |
| <i>AtMRE11</i>      | AT5G54260             |
| <i>AtRAD50</i>      | AT2G31970             |
| <i>AtRAD51</i>      | AT5G20850             |
| <i>AtRAD51C</i>     | AT2G45280             |
| <i>AtXRCC3</i>      | AT5G57450             |
| <i>AtMSH4</i>       | AT4G17380             |
| <i>AtMSH5</i>       | AT3G20475             |
| <i>RCK (AtMER3)</i> | AT3G27730             |
| <i>AtPTD</i>        | AT1G12790             |
| <i>AtMUS81</i>      | AT4G30870             |
| <i>AtMLH3</i>       | AT4G35520             |
| <i>SDS</i>          | AT1G14750             |
| <i>TAM</i>          | AT1G77390             |
| <b>Total</b>        | 15                    |
