# Supplementary material for: Characterization of a set of novel meiotically-active promoters in Arabidopsis
Source: PubMed Central journal article supplement (PMC3462685; doi:10.1186/1471-2229-12-104), 2012-07-09
Supplement: 1471-2229-12-104-S8.pdf [file 1471-2229-12-104-S8.pdf]

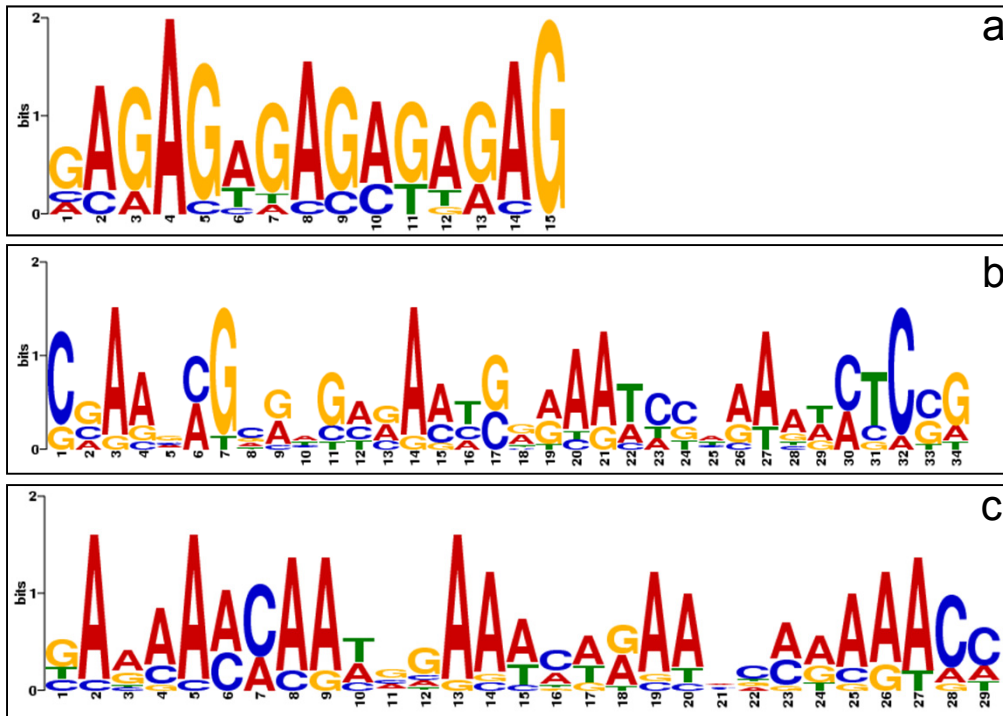

**Figure S5** Sequence logos of novel motifs in promoters of homologous recombination-related genes found by MEME. (a), E-value:  $7.2 \times 10^{-5}$ ; found within 11 promoters. (b), E-value:  $2.9 \times 10^1$ ; found within ten promoters. (c), E-value:  $3.7 \times 10^1$ ; found within 13 promoters.
