# Supplementary material for: Characterization of a set of novel meiotically-active promoters in Arabidopsis
Source: PubMed Central journal article supplement (PMC3462685; doi:10.1186/1471-2229-12-104), 2012-07-09
Supplement: 1471-2229-12-104-S9.pdf [file 1471-2229-12-104-S9.pdf]

**Table S4** Motifs enriched specifically in 15 known meiosis-related promoters.

| <b>MATRIX_ID</b> | <b><i>p</i>-value</b> | <b>Name/Class/Family of<br/>the TF</b>               | <b>Description of the CRE</b>                                                                         |
|------------------|-----------------------|------------------------------------------------------|-------------------------------------------------------------------------------------------------------|
| MA0034.1         | 2.28025e-02           | Gamyb; Helix-turn-<br>helix; Myb                     | Binding site of GAMYB which is expressed in<br>cereal aleurone cells in response to gibberellin [80]. |
| MA0044.1         | 2.41054e-02           | HMG-1; Other alpha-<br>helix; High mobility<br>group | Binding site of the chromatin-associated protein<br>HMG-1 [3, 48].                                    |
| MA0008.1         | 9.1623e-02            | HAT5; Helix-turn-<br>helix; Homeodomain              | Binding site of HAT5, a transcription activator<br>involved in leaf development [81].                 |
